# Supplementary material for: Competing effects of aerosol reductions and circulation changes for future improvements in Beijing haze
Source: Copernicus journal article supplement (doi:10.5194/acp-21-15299-2021), 2021-10-14
Supplement: Supplementary file 1 [file acp-21-15299-2021-supplement.pdf]

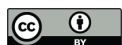

*Supplement of*

## **Competing effects of aerosol reductions and circulation changes for future improvements in Beijing haze**

**Liang Guo et al.**

*Correspondence to:* Liang Guo (l.guo@reading.ac.uk)

The copyright of individual parts of the supplement might differ from the article licence.

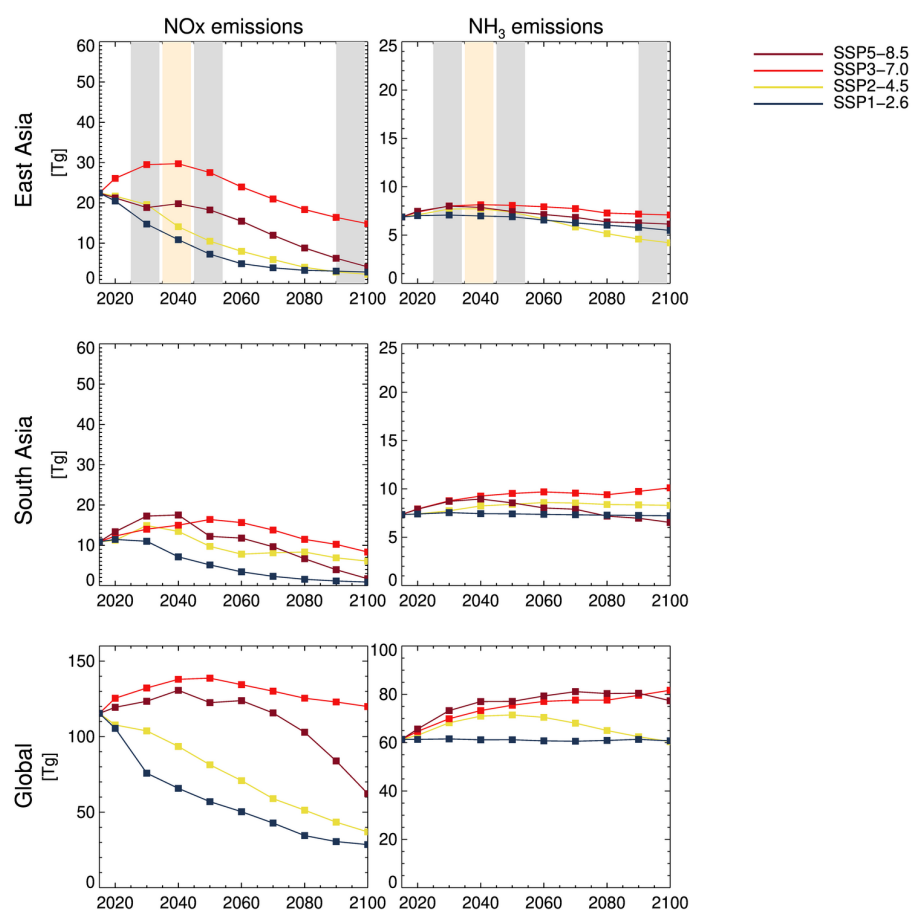

Figure S1. Time series of total emissions for NO<sub>x</sub> and NH<sub>3</sub> in SSPs 1-2.6, 2-4.5, 3-7.0 and 5-8.5 from East Asia, South Asia and global mean.

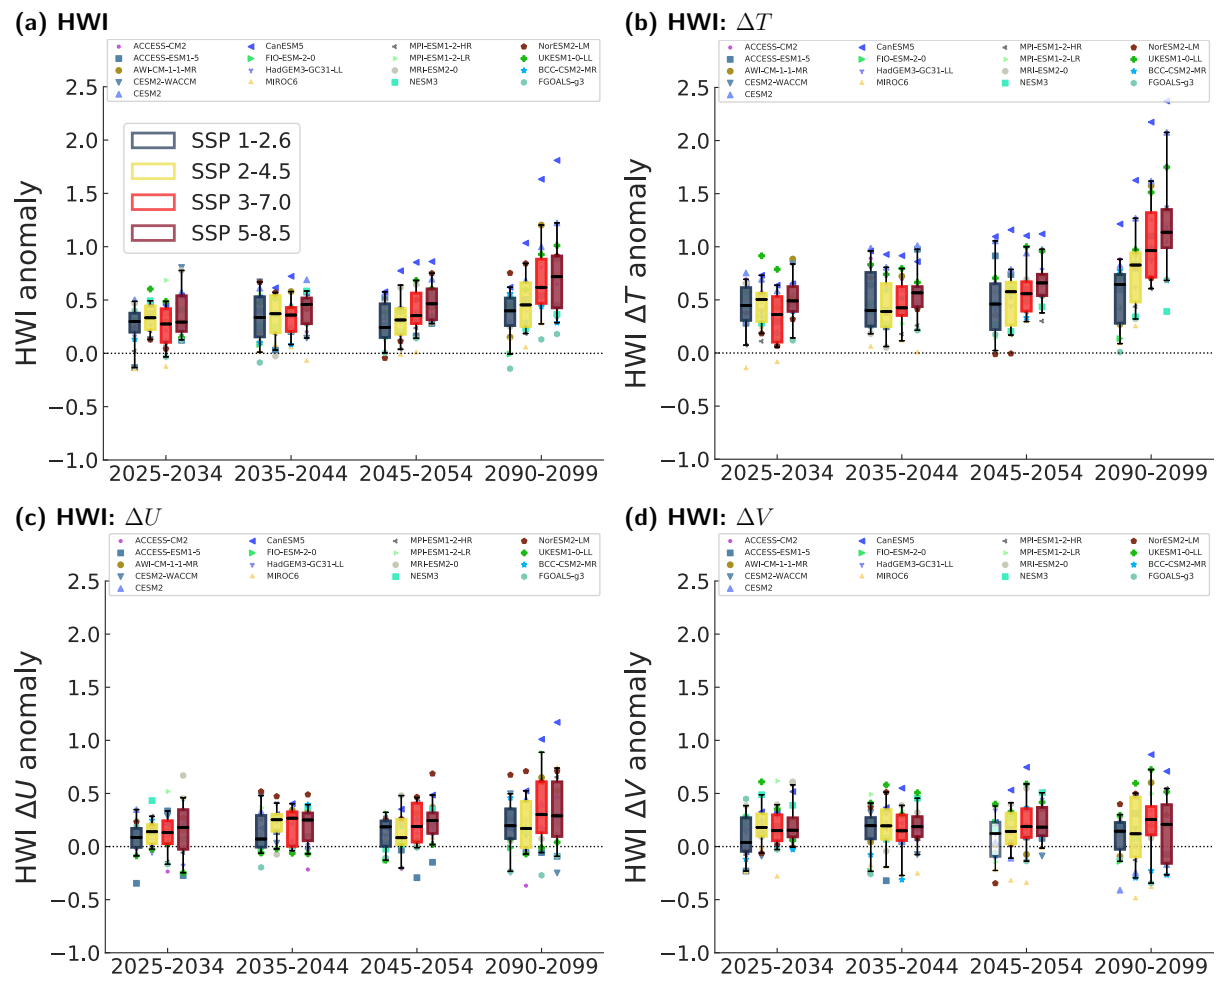

Figure S2. (a) A reproduction of Figure 4a and (b, c, d) HWI components illustrated in the same way.

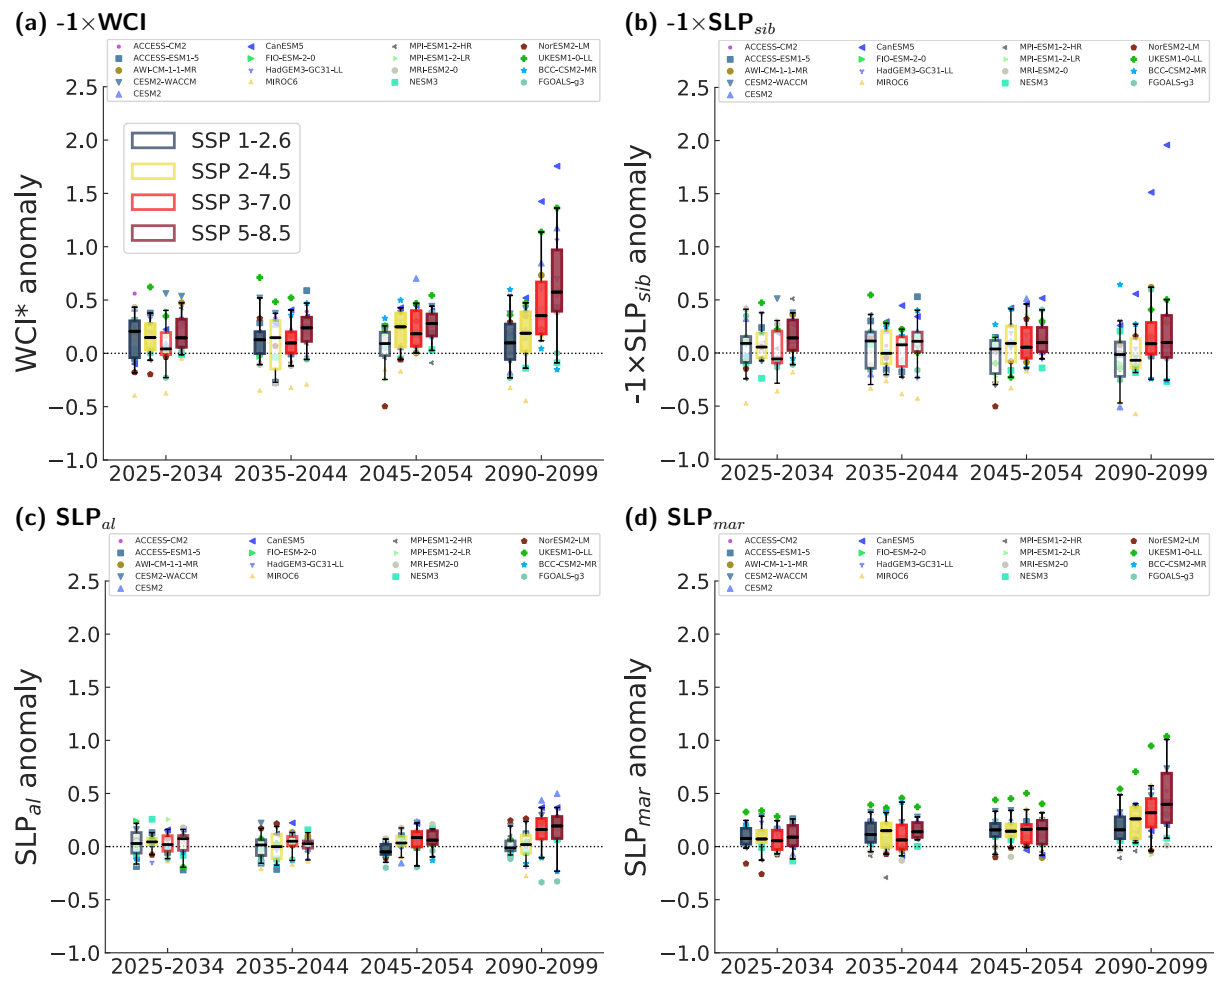

Figure S3. (a) A reproduction of Figure 4b and (b, c, d) WCI components illustrated in the same way.

**(a) SSP1-2.6:  $\Delta T$ :  
2025~2034**

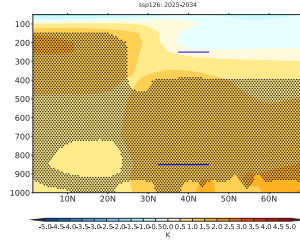

**(b) SSP1-2.6:  $\Delta T$ :  
2090~2099**

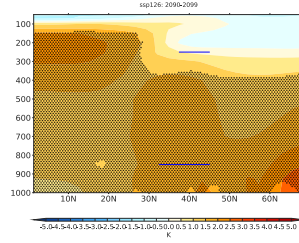

**(c) SSP3-7.0:  $\Delta T$ :  
2025~2034**

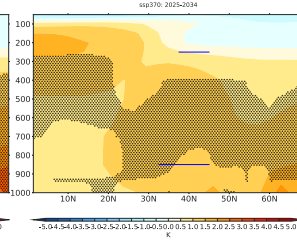

**(d) SSP3-7.0:  $\Delta T$ :  
2090~2099**

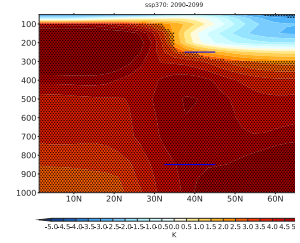

**(e) SSP1-2.6:  $\Delta U@500$ :  
2025~2034**

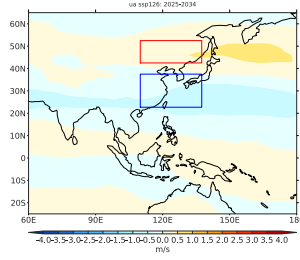

**(f) SSP1-2.6:  $\Delta U@500$ :  
2090~2099**

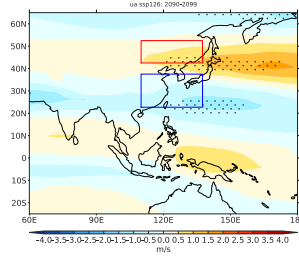

**(g) SSP3-7.0:  $\Delta U@500$ :  
2025~2034**

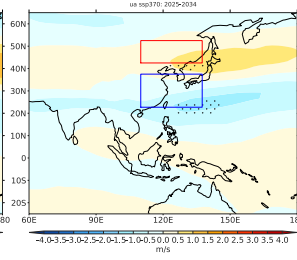

**(h) SSP3-7.0:  $\Delta U@500$ :  
2090~2099**

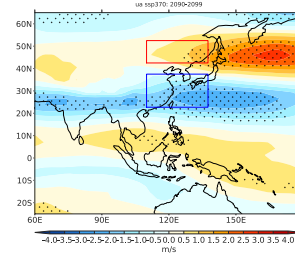

**(i) SSP1-2.6:  $\Delta V@850$ :  
2025~2034**

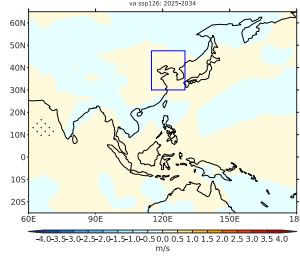

**(j) SSP1-2.6:  $\Delta V@850$ :  
2090~2099**

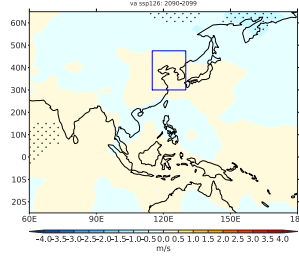

**(k) SSP3-7.0:  $\Delta V@850$ :  
2025~2034**

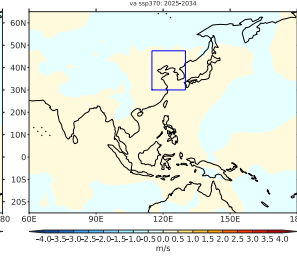

**(l) SSP3-7.0:  $\Delta V@850$ :  
2090~2099**

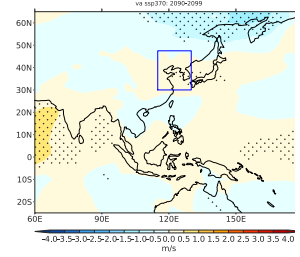

**(m) SSP1-2.6:  $\Delta SLP$ :  
2025~2034**

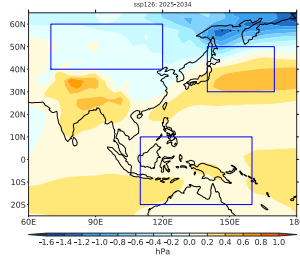

**(n) SSP1-2.6:  $\Delta SLP$ :  
2090~2099**

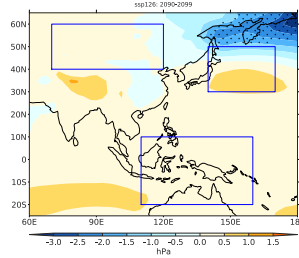

**(o) SSP3-7.0:  $\Delta SLP$ :  
2025~2034**

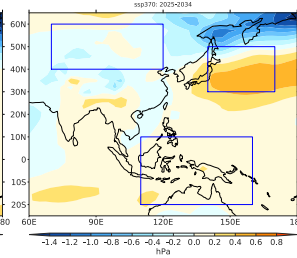

**(p) SSP3-7.0:  $\Delta SLP$ :  
2090~2099**

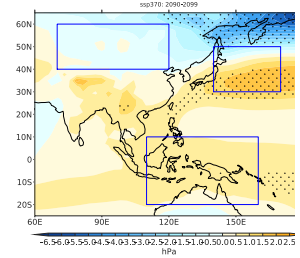

Figure S4. Differences in  $T$ ,  $U$ ,  $V$  and  $SLP$  between future scenarios and present-day. Scenarios shown are SSPs1-2.6 and 3-7.0. Periods chosen are near future (2025-2034) and the end of the 21st century (2090-2099). Difference that is above 90% confidence level is stippled. Boxes indicate areas from which averaged values are used to compute HWI and WCI.
